# Supplementary material
Source: PubMed Central journal article supplement (PMC7642696)
Supplement: ijcep0013-2513-f6.pdf [file ijcep0013-2513-f6.pdf]

# TMB and immune infiltration in ovarian cancer

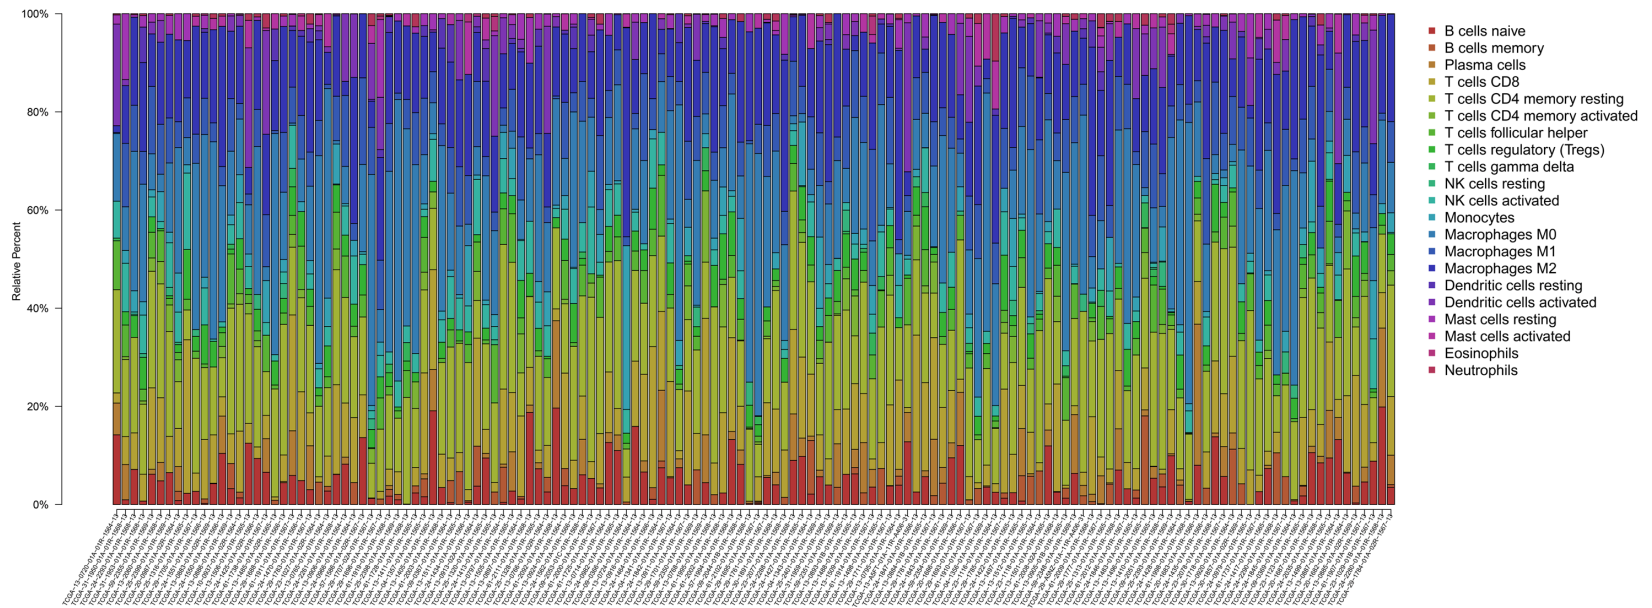

**Figure S1.** The percentages of 22 specific immune cells in each ovarian cancer sample.

## TMB and immune infiltration in ovarian cancer

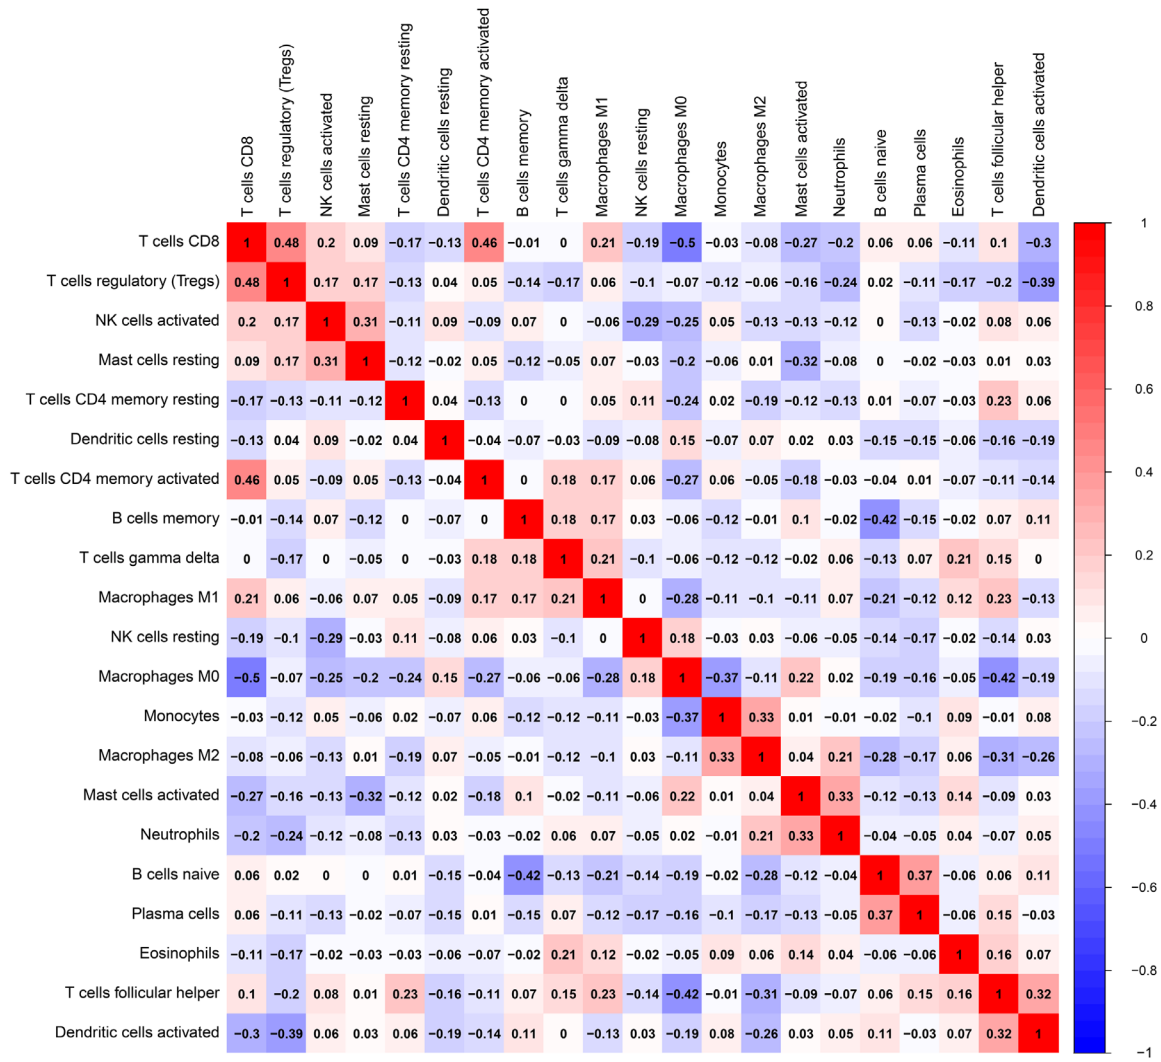

**Figure S2.** Correlation among the 22 specific immune cell percentages in ovarian cancer. Blue represents negative correlation, while red represents positive correlation.
